# Supplementary material for: Next-Generation Sequencing Analysis Reveals Frequent Familial Origin and Oligogenism in Congenital Hypothyroidism With Dyshormonogenesis
Source: PubMed Central journal article supplement (PMC8264654; doi:10.3389/fendo.2021.657913), 2021-06-24
Supplement: DataSheet_2.pdf [file DataSheet_2.pdf]

| ID  | Sex | Serum TSH      | Serum FT4 | Thyroid Evaluation | CH Severity | Permanent/transient |
|-----|-----|----------------|-----------|--------------------|-------------|---------------------|
|     |     | (confirmation) |           |                    |             |                     |
| F38 | F   | 25             | 11.8      | Eutopic            | Mild        | Transient           |
| F39 | F   | 20             | 12.9      | Eutopic            | Mild        | Transient           |
| F40 | M   | 20             | 6.2       | Eutopic            | Moderate    | Transient           |
| F41 | M   | 43             | 5.3       | Eutopic            | Moderate    | Transient           |
| F42 | M   | 56             | 10.7      | Goitre             | Mild        | Transient           |
| F43 | M   | 65             | 15        | Goitre             | Mild        | Permanent           |
| F44 | M   | 45             | 7         | Goitre             | Moderate    | Permanent           |
| F45 | M   | 25             | 13.4      | Eutopic            | Mild        | Transient           |
| F46 | M   | 62             | 11.5      | Goitre             | Mild        | Transient           |
| F47 | F   | 22             | 7.2       | Eutopic            | Moderate    | Permanent           |
| F48 | F   | 66             | 6.2       | Eutopic            | Moderate    | Permanent           |
| F49 | F   | 37             | 14.6      | Goitre             | Mild        | Permanent           |
| F50 | F   | 78             | 13        | Goitre             | Mild        | Transient           |
| F51 | M   | 30             | 8.6       | Eutopic            | Moderate    | Permanent           |
| F52 | M   | 22             | 5.1       | Eutopic            | Moderate    | Permanent           |
| F53 | F   | 28             | 8.7       | Eutopic            | Moderate    | Transient           |
| F54 | M   | 45             | 8.6       | Eutopic            | Moderate    | Transient           |
| F55 | M   | 29             | 7         | Eutopic            | Moderate    | Transient           |
| F56 | M   | 12             | 5.4       | Eutopic            | Moderate    | Transient           |
| F57 | M   | 29             | 5.9       | Eutopic            | Moderate    | Transient           |
| F58 | F   | 43             | 6.2       | Eutopic            | Moderate    | Transient           |
| F59 | F   | 67             | 7.2       | Eutopic            | Moderate    | Transient           |
| F60 | F   | 55             | 8.6       | Eutopic            | Moderate    | Transient           |
| F61 | F   | 23             | 7         | Eutopic            | Moderate    | Permanent           |
| F62 | F   | 20             | 9.1       | Eutopic            | Moderate    | Permanent           |
| F63 | F   | 12             | 7.4       | Eutopic            | Moderate    | Permanent           |
| F64 | M   | 18             | 8.1       | Eutopic            | Moderate    | Permanent           |
| F65 | F   | 27             | 8.4       | Eutopic            | Moderate    | Transient           |

**Supplemental Table 2: Clinical and biological data for the 28 children diagnosed for TDH without identified variant.**

Severity of disease is defined on FT4 levels at the age of 10 days according to ESPE consensus criteria in mild, moderate or severe (respectively in clear, grey or black); severe < 5 pmol/L; moderate: 5-10 pmol/L; mild : 10-15 pmol/L. Serum TSH at confirmation : IU/ml; FT4 : pmol/L.
